# Supplementary material for: An improved empirical bayes approach to estimating differential gene expression in microarray time-course data: BETR (Bayesian Estimation of Temporal Regulation)
Source: Springer Nature journal article supplement (doi:10.1186/1471-2105-10-409), 2009-12-01

True positive rate

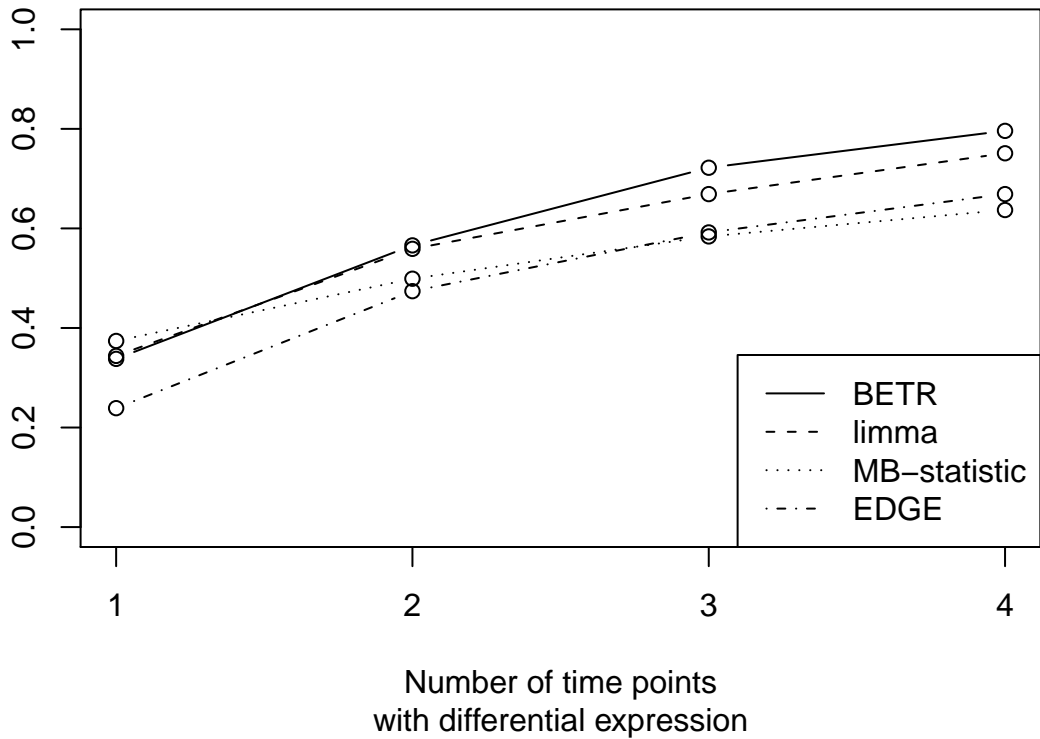

Supplement: 12859_2009_3139_MOESM4_ESM.pdf [file 12859_2009_3139_MOESM4_ESM.pdf]
